# Supplementary material for: Temporal Analyses of the Response of Intervertebral Disc Cells and Mesenchymal Stem Cells to Nutrient Deprivation
Source: Stem Cells Int. 2016 Feb 10;2016:5415901. doi: 10.1155/2016/5415901 (PMC4764757; doi:10.1155/2016/5415901)
Supplement: Supplementary file 1 — Supplementary Table 1: Mean percentage of live cells at the end time point (compared to initial live cell number) for bovine and human NP cultures and human MSCs in each of the defined nutrient conditions tested. Standard error of the mean (SEM) is also noted. Supplementary Table 2: Mean cell area (µm2) for bovine and human NP cultures and human MSCs in each of the defined nutrient conditions tested. Standard error of the mean (SEM) is also noted. [file 5415901.f1.xlsx]

## Sheet: Sheet1
	Mean % live cell number at end time point
		0% FBS No Glucose	0% FBS Moderate Glucose	0% FBS High Glucose	10% FBS No Glucose	10% FBS Moderate Glucose	10% FBS High Glucose	20% FBS No Glucose	20% FBS Moderate Glucose
	Bovine NP cells
	Mean	50.1711	179.26	85.8696	259.435	403.59	85.0509	267.125	370.687
	SEM	0.779965	47.6223	7.0653	24.487	71.04	13.5421	35.307	32.7631
	Human NP cells
	Mean	106.139	128.44	132.556	133.86	106.379	107.017	118.878	119.672
	SEM	4.37893	10.0833	10.4046	4.07499	4.62629	4.93308	3.59243	5.94028
	Human MSCs
	Mean	93.888	145.875	162.176	111.416	135.056	113.992	114.549	144.698
	SEM	8.54785	10.1249	22.0653	5.80627	17.3906	7.2609	7.75195	10.1727
	Mean cell area at end time point (µm2)
		0% FBS No Glucose	0% FBS Moderate Glucose	0% FBS High Glucose	10% FBS No Glucose	10% FBS Moderate Glucose	10% FBS High Glucose	20% FBS No Glucose	20% FBS Moderate Glucose
	Bovine NP cells
	Mean	1395.63	1947.53	1809.13	2155.03	1585.08	1545.44	2057.35	1560.67
	SEM	80.2385	142.546	90.7833	70.2667	124.559	122.207	117.193	80.282
	Human NP cells
	Mean	7339.43	9862.97	9085.58	8359.99	12802.7	8439.27	7298.47	7172.55
	SEM	1663.43	1605.38	1656.65	1309.42	2003.1	1873.96	940.105	1067.17
	Human MSCs
	Mean	16627.4	11305.6	13922.5	18965.8	12732.7	16283.4	7116.23	11076
	SEM	4791.85	2101.44	1832.21	4297.59	1285.1	2217.64	879.721	2404.77
